# Supplementary material for: Molecular recognition of parallel quadruplex [d-(TTGGGGT)]4 by mitoxantrone: binding with 1 : 4 stoichiometry leads to telomerase inhibition
Source: Royal Society of Chemistry journal article supplement (doi:10.1039/c6ra05266e), 2016-01-01
Supplement: c6ra05266e1.pdf [file c6ra05266e1.pdf]

## **Molecular recognition of parallel quadruplex d-(TTGGGGT)<sub>4</sub> by mitoxantrone: binding with 1:4 stoichiometry leads to telomerase inhibition**

Tarikere Palakashan Pradeep, Sweta Tripathi and Ritu Barthwal\*

*Department of Biotechnology, Indian Institute of Technology Roorkee, Roorkee 247667, India,*

*E Mail: ritubfbs@iitr.ac.in*

### **Supplementary Information**

S1: Results of Surface Plasmon Resonance for binding of mitoxantrone to 22-mer d-[5'-GGGG(TTGGGG)<sub>3</sub>-3'] using HEPES buffer with 100 mM KCl (A) Sensograms obtained for unbound mitoxantrone concentration of 15, 30, 60, 90, 180 and 360  $\mu$ M, from bottom to top curves. (B) Binding plots showing Response Unit (RU) versus concentration of mitoxantrone from steady state data.

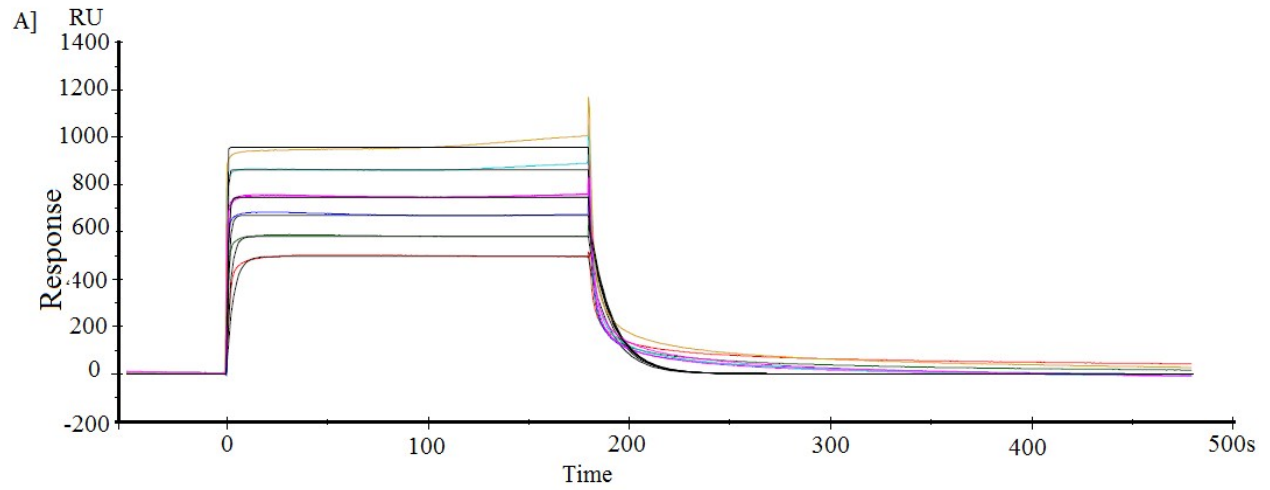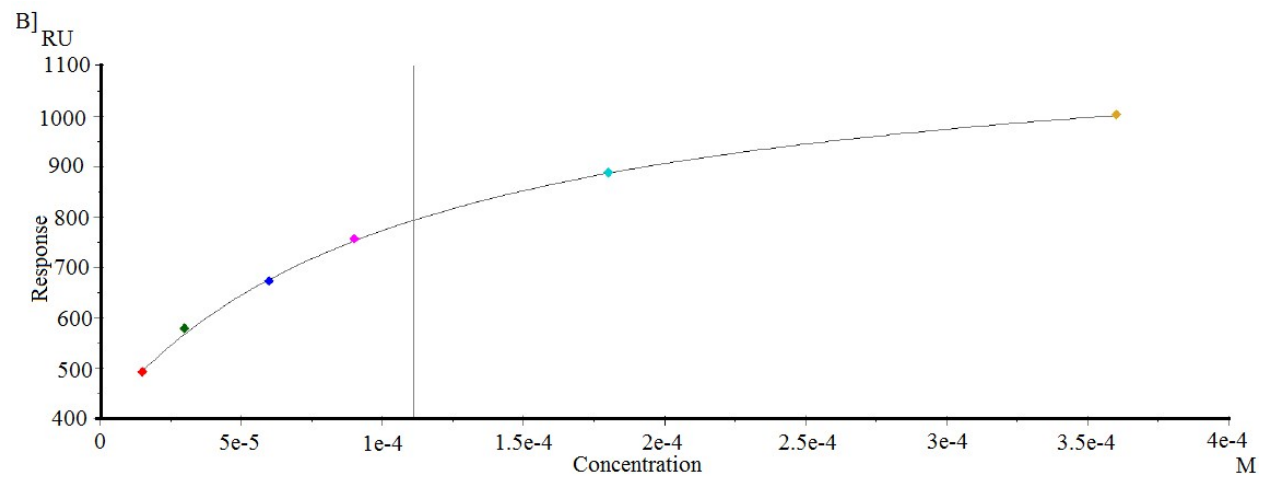

S2: Absorbance and CD overlay of uncomplexed MTX and 4:1 d-(TTGGGGT)<sub>4</sub> complexed MTX in 20 mM phosphate buffer with 100 mM KCl at 298 K showing bisignate induced CD band.

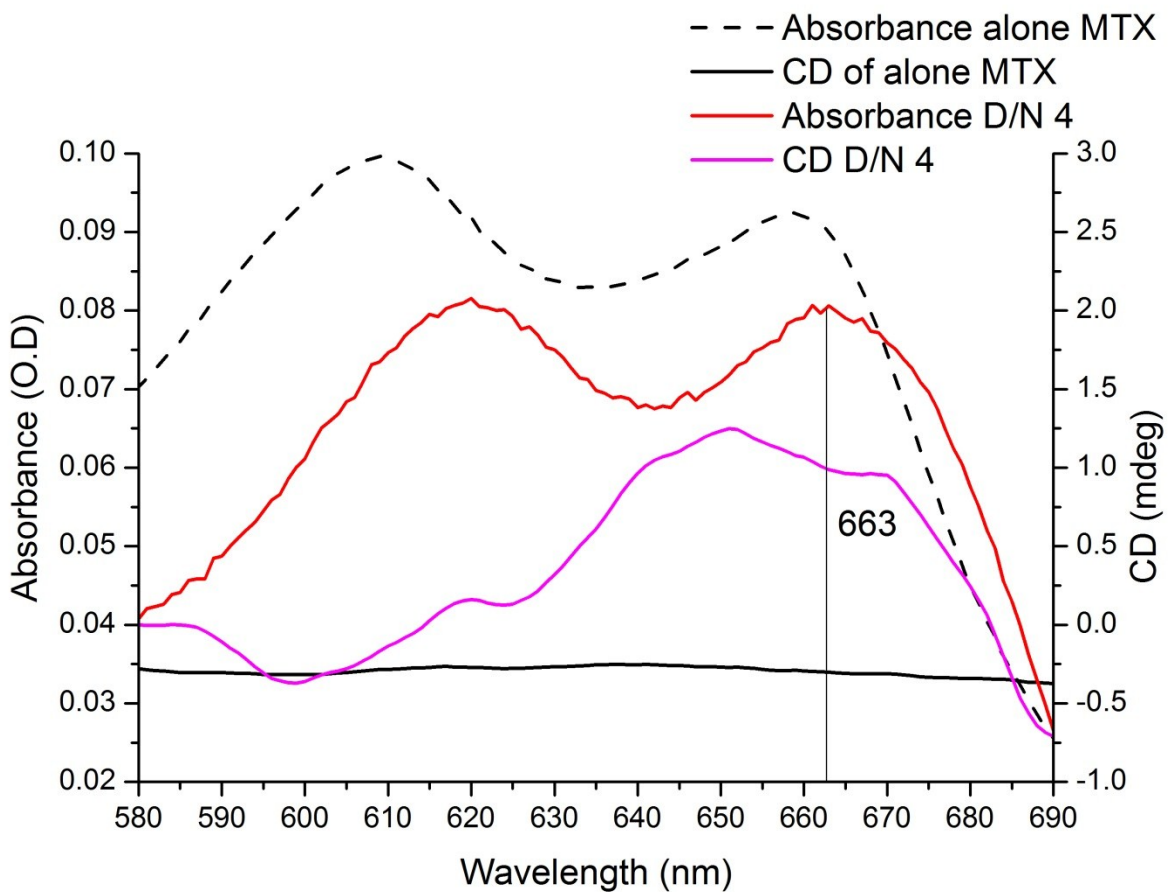

SI Table 1: SPR data with equilibrium binding constants for binding of MTX with 7-mer d-(TTGGGGT)<sub>4</sub> and 22-mer d-[5'-G<sub>4</sub>(T<sub>2</sub>G<sub>4</sub>)<sub>3</sub>-3'].

| <b>Experiment</b>                | <b>Flow rate<br/>(<math>\mu\text{l}/\text{min}</math>)</b> | <b>RU<sub>max</sub><br/>(RU)</b> | <b><math>k_a</math><br/>(<math>\text{M}^{-1} \text{s}^{-1}</math>)</b> | <b><math>k_d</math><br/>(<math>\text{s}^{-1}</math>)</b> | <b><math>K_D</math><br/>(M)</b> | <b><math>K_A</math><br/>(<math>\text{M}^{-1}</math>)</b> | <b>Chi<sup>2</sup><br/>(RU<sup>2</sup>)</b> |
|----------------------------------|------------------------------------------------------------|----------------------------------|------------------------------------------------------------------------|----------------------------------------------------------|---------------------------------|----------------------------------------------------------|---------------------------------------------|
| 7-mer<br>(kinetics<br>run 1)     | 30                                                         | 1375                             | $1.185 \times 10^4$                                                    | 0.3947                                                   | $3.33 \times 10^{-5}$           | $3.00 \times 10^4$                                       | 171.0                                       |
| 7-mer<br>(kinetics<br>run 2)     | 30                                                         | 1174                             | $1.134 \times 10^4$                                                    | 0.3236                                                   | $2.85 \times 10^{-5}$           | $3.50 \times 10^4$                                       | 354.0                                       |
| 7-mer<br>(steady<br>state run 1) | 30                                                         | 1375                             | -                                                                      | -                                                        | $9.65 \times 10^{-5}$           | $1.03 \times 10^4$                                       | 358.3                                       |
| 7-mer<br>(steady<br>state run 2) | 30                                                         | 1174                             | -                                                                      | -                                                        | $8.75 \times 10^{-5}$           | $1.14 \times 10^4$                                       | 308.8                                       |
| 22-mer<br>(kinetics<br>run)      | 30                                                         | 663                              | $1.428 \times 10^4$                                                    | 0.0872                                                   | $6.104 \times 10^{-6}$          | $1.64 \times 10^5$                                       | 955.0                                       |
| 22-mer<br>(steady<br>state run)  | 30                                                         | 460                              |                                                                        |                                                          | $1.11 \times 10^{-4}$           | $0.91 \times 10^4$                                       | 402.3                                       |
